# Supplementary material for: β-Carotene Supplementation and Risk of Cardiovascular Disease: A Systematic Review and Meta-Analysis of Randomized Controlled Trials
Source: MDPI journal article supplement (doi:10.3390/nu14061284), 2022-03-18
Supplement: s1 [file s1]

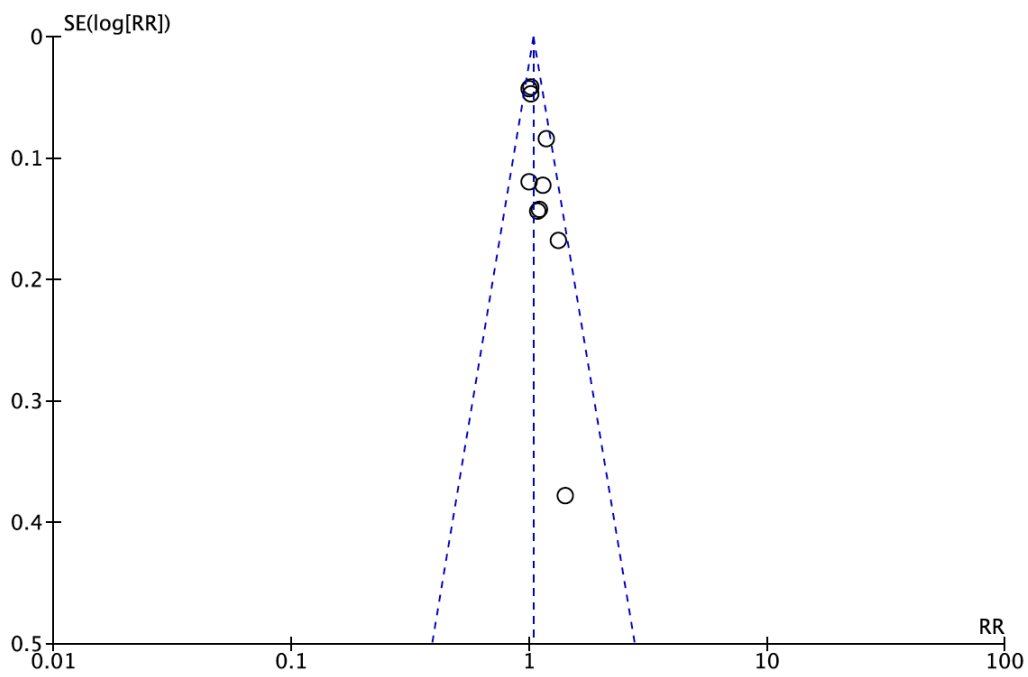

Figure S1. Major cardiovascular incidence funnel plot.

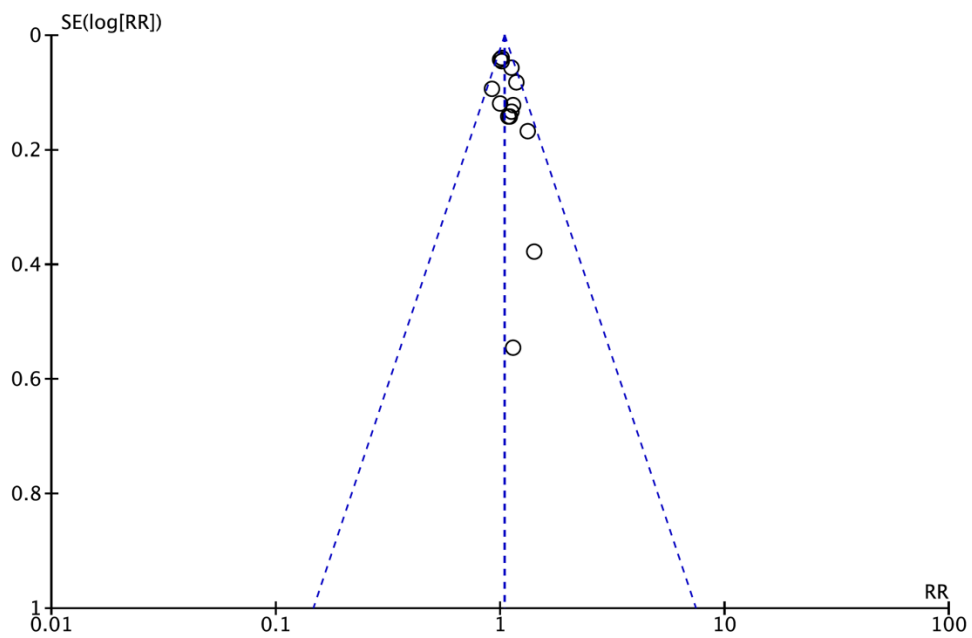

Figure S2. Overall cardiovascular incidence funnel plot.

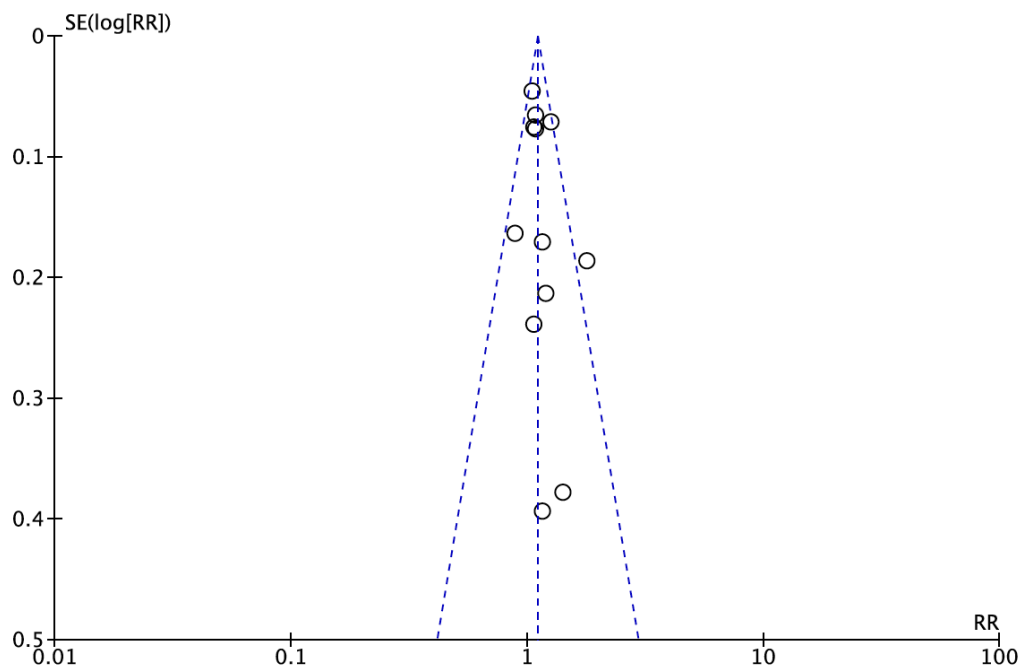

Figure S3. Cardiovascular mortality funnel plot.

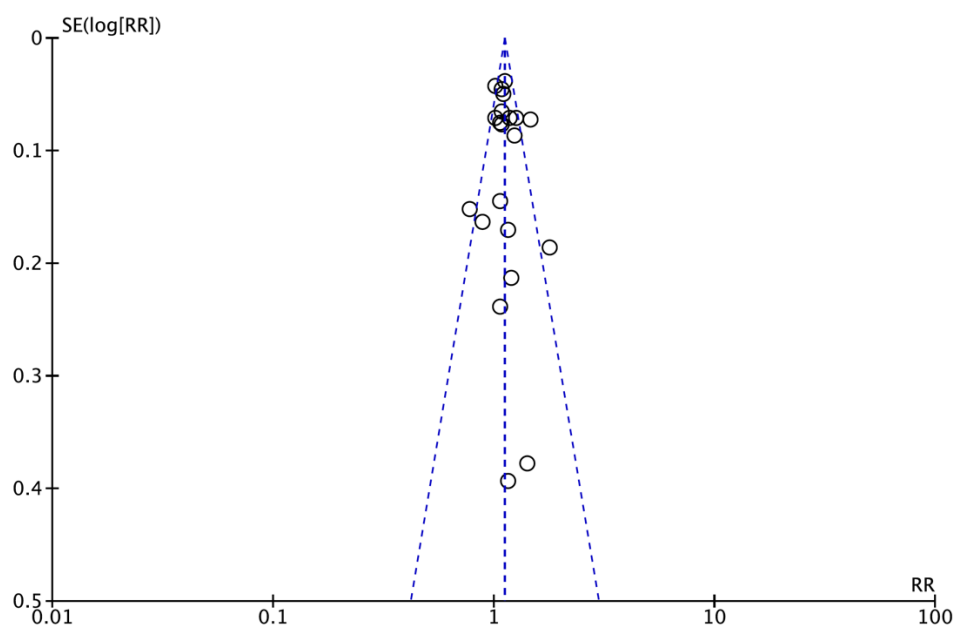

Figure S4. Overall mortality funnel plot.

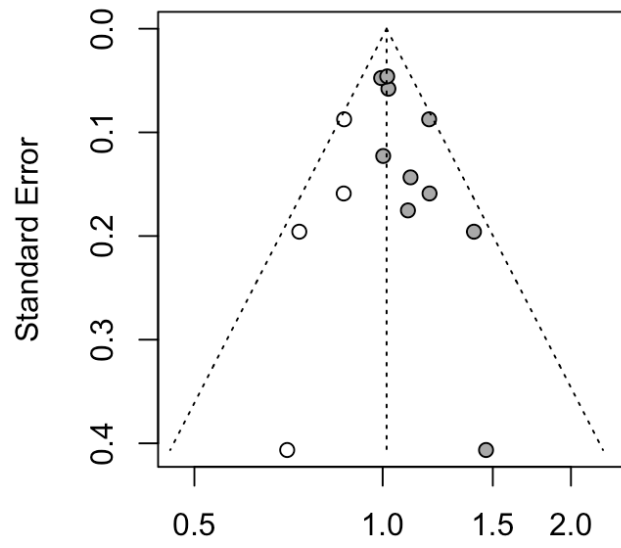

Figure S5. Trim-and-fill funnel plot for major cardiovascular disease incidence.
